# Supplementary material for: Quantitative Analysis of Factors Regulating Angiogenesis for Stem Cell Therapy
Source: MDPI journal article supplement (doi:10.3390/biology10111212), 2021-11-20
Supplement: s1 [file s1]

## Flavonoids

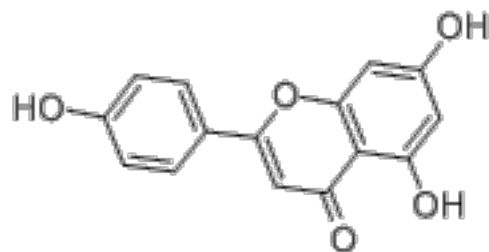

Apigenin

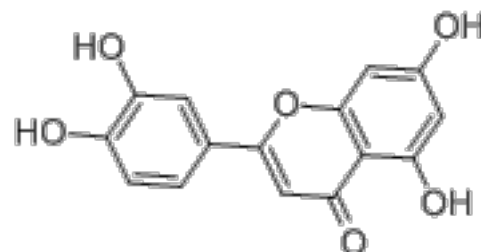

Luteolin

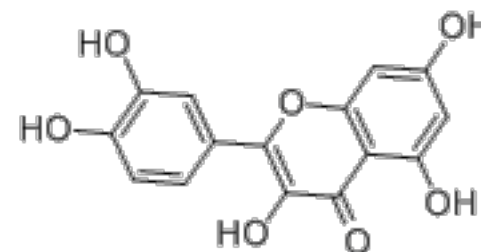

Quercetin

## Polyphenol

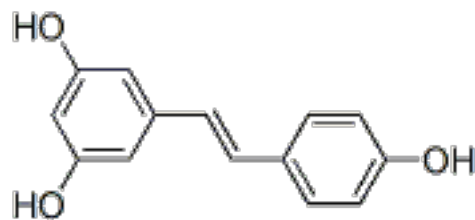

Resveratrol

**Figure S1. Structure of Flavonoids and Polyphenol used in this paper.**

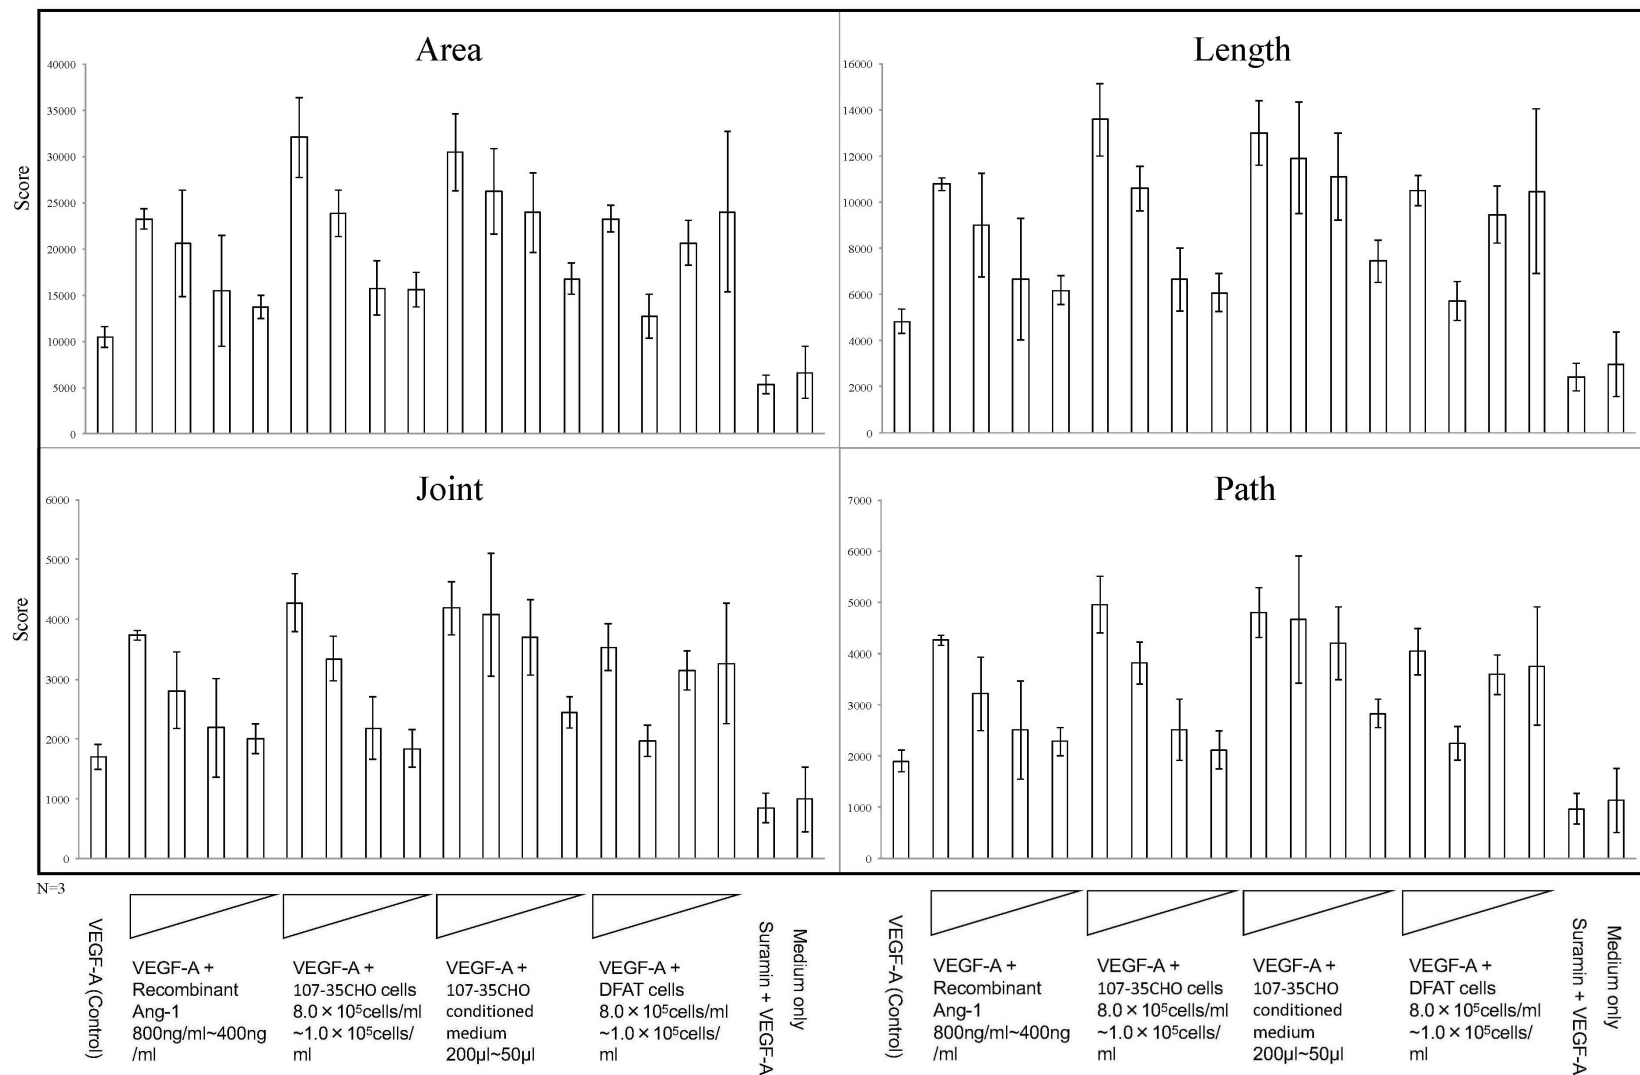

**Figure S2. Results of quantitative analysis by using *KURABO Angiogenesis Image Analyzer* (Promotion)** The promoting factor added to the cultures were Ang-1 that is known to stabilize the blood vessel. The results of quantitative analysis suggested that Ang-1 has a promoting effect on angiogenesis. Result of triplicated experiments for each sample were shown with standard deviations.

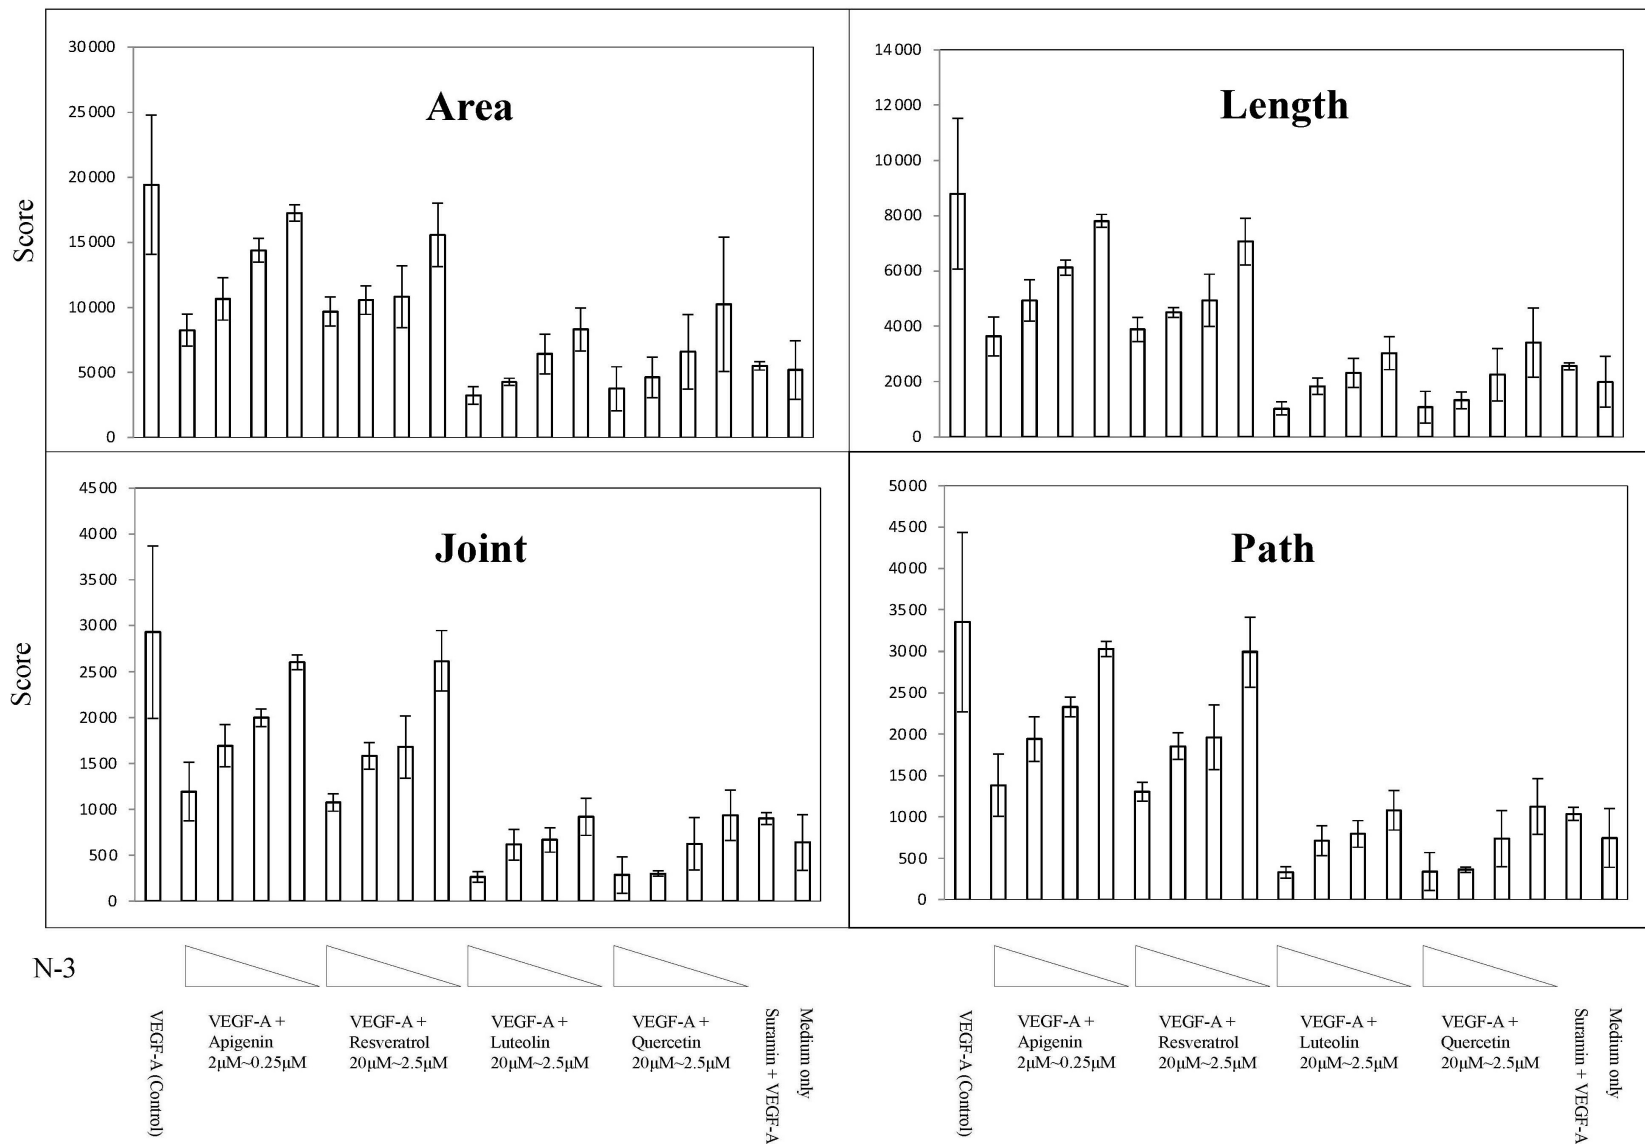

**Figure S3. Results of quantitative analysis by using KURABO Angiogenesis Image Analyzer (Polyphenols)**  
 The stained images were subjected to the quantitative microscope analysis by using the software attached to the kit. Flavonoids or polyphenol showed inhibitory effects on angiogenesis in a dose dependent manner. Particularly, luteolin and the quercetin showed remarkable effects. Result of triplicated experiments for each sample were shown with standard deviations.

**Table S1. PCR primers for analyzed genes analyzed**

| Primer       |   | Tm1 | Tm2 |                                       |
|--------------|---|-----|-----|---------------------------------------|
| vWF          | F | 54  | 54  | 5'- AGC CTT GTG AAA CTG AAG CAT -3'   |
| 237 bp       | R | 58  | 54  | 5'- GCC CTG GTT GCC ATT GTA ATT C -3' |
| PECAM        | F | 58  | 55  | 5'- ACC GTG ACG GAA TCC TTC TCT -3'   |
| 246 bp       | R | 57  | 53  | 5'- GCT GGA CTC CAC TTT GCA C -3'     |
| $\alpha$ SMA | F | 57  | 55  | 5'- CTG AGC GTG GCT ATT CCT TC -3'    |
| 480 bp       | R | 60  | 55  | 5'- GCT GGA AGG TGG ACA GAG AG -3'    |
| Flk1         | F | 57  | 55  | 5'- CAG CTT CCA AGT GGC TAA GG -3'    |
| 463 bp       | R | 51  | 48  | 5'- ATT TCC CAA ATG TTC CAC CA -3'    |
| GAPDH        | F | 57  | 53  | 5'- ACC CAG AAG ACT GTG GAT GG -3'    |
| 421 bp       | R | 55  | 53  | 5'- CCC TGT TGC TGT AGC CAA AT -3'    |

| Primer        |   | Tm1 | Tm2 |                                     |
|---------------|---|-----|-----|-------------------------------------|
| COX-1         | F | 55  | 51  | 5'- TCA TCG AGG AGT ACG TGC -3'     |
| 661 bp        | R | 57  | 53  | 5'- AGG GAC AGG TCT TGG TGT TG -3'  |
| COX-2         | F | 53  | 53  | 5'- TAA ACT GCG CCT TTT CAA GG -3'  |
| 620 bp        | R | 51  | 48  | 5'- GTG ATA CTT TCT GTA CTG CT -3'  |
| PPAR $\gamma$ | F | 60  | 58  | 5'- CAG GAG CAG AGC AAA GAG GTG -3' |
| 250 bp        | R | 56  | 53  | 5'- CAA ACT CAA ACT TGG GCT CCA -3' |
| GAPDH         | F | 57  | 53  | 5'- ACC CAG AAG ACT GTG GAT GG -3'  |
| 421 bp        | R | 55  | 53  | 5'- CCC TGT TGC TGT AGC CAA AT -3'  |

| Primer |   | Tm1 | Tm2 |                                       |
|--------|---|-----|-----|---------------------------------------|
| eNOS   | F | 65  | 63  | 5'- GCT GCG CCA GGC TCT CAC CTT C -3' |
| 105 bp | R | 61  | 61  | 5'- GGC TGC AGC CCT TTG CTC TCAA -3'  |
| GAPDH  | F | 57  | 53  | 5'- ACC CAG AAG ACT GTG GAT GG -3'    |
| 421 bp | R | 55  | 53  | 5'- CCC TGT TGC TGT AGC CAA AT -3'    |
