# Supplementary figures and images for: Quantitative Analysis of Factors Regulating Angiogenesis for Stem Cell Therapy
Source: MDPI journal article supplement (doi:10.3390/biology10111212), 2021-11-20

RT-PCR original No.1

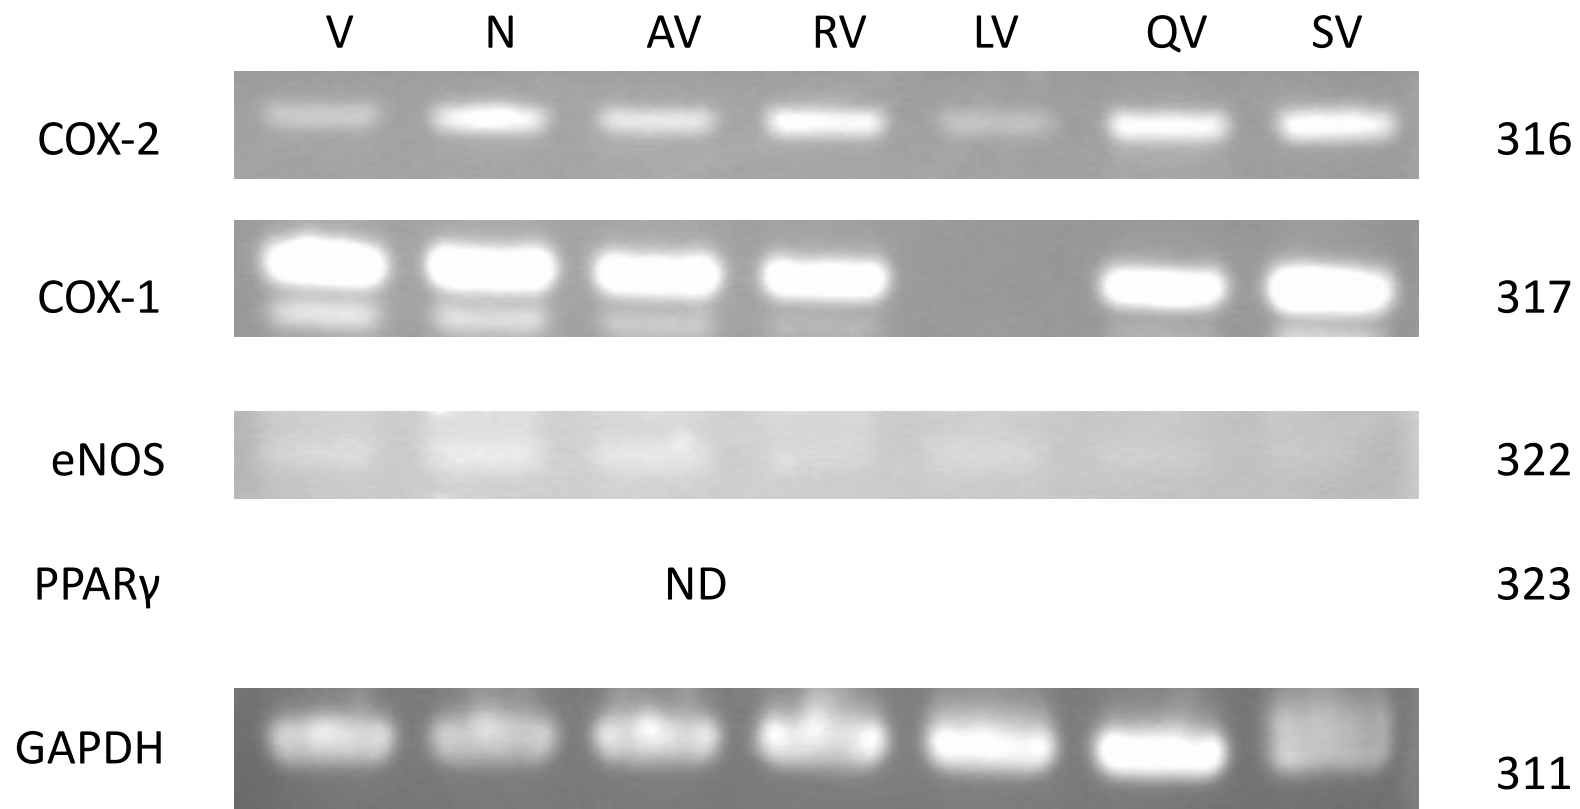

RT-PCR original No.2

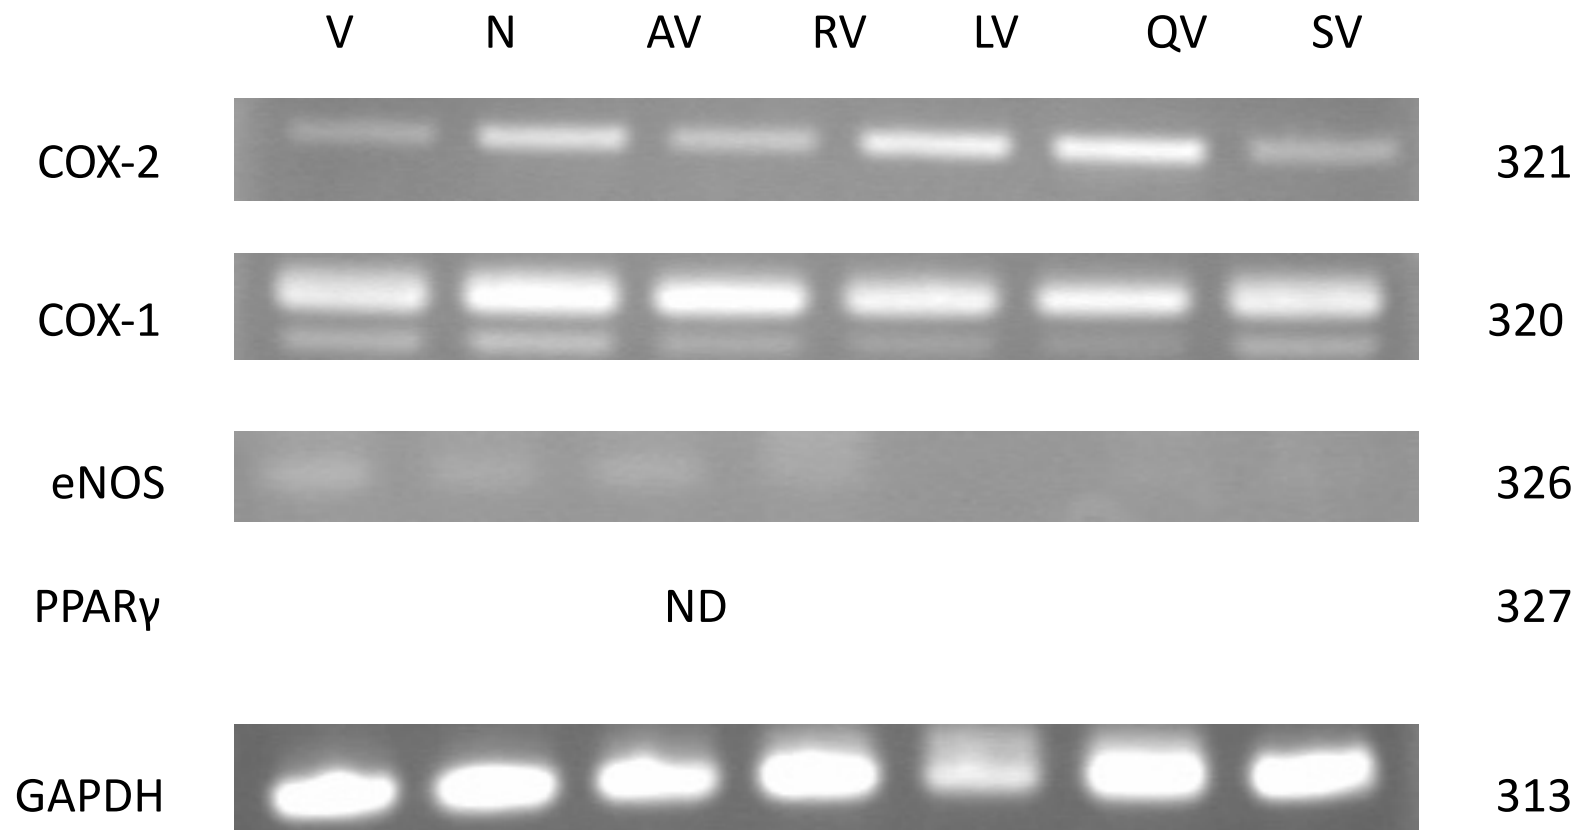

RT-PCR original No.3

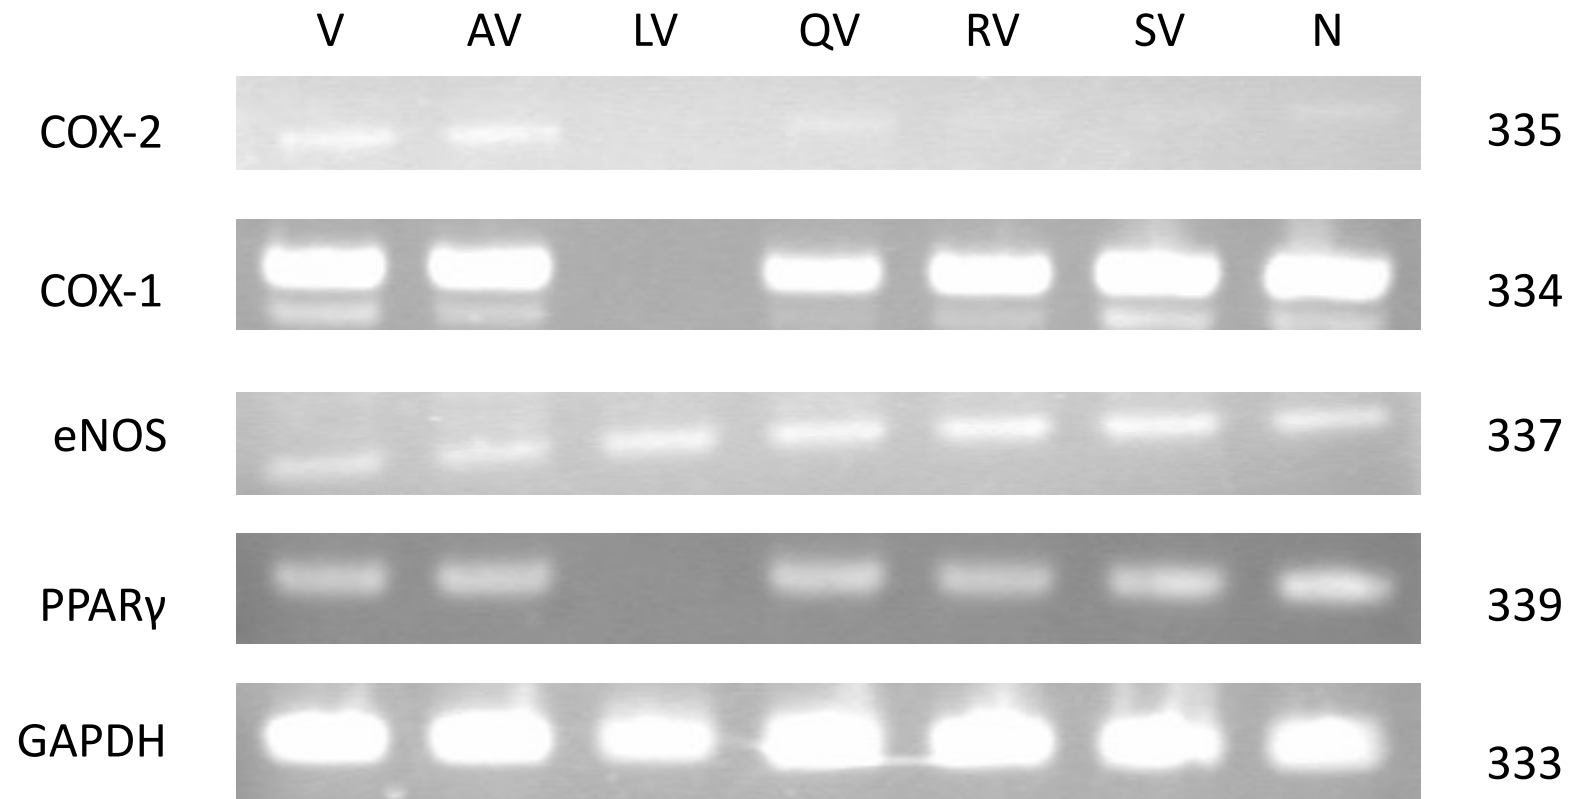

Supplement: s1 [file s1]
